# Supplementary material for: Quantification of left coronary bifurcation angles and plaques by coronary computed tomography angiography for prediction of significant coronary stenosis: A preliminary study with dual-source CT
Source: PLoS One. 2017 Mar 27;12(3):e0174352. doi: 10.1371/journal.pone.0174352 (PMC5367806; doi:10.1371/journal.pone.0174352)
Supplement: S2 File — A list of the baseline characteristics and left coronary bifurcation angles of the study population. (XLSX) [file pone.0174352.s002.xlsx]

## Sheet: Sheet1
Number	Sex	Age (years)	BMI (kg/m2)	Hypertension	Hyperlipidemia	Diabetes	Currently smoking	Currently drinking	Family history of CAD	Percutaneous coronary intervention	Previous myocardial infarction	Angina	Left coronary stenosis severity by CAG (%)	LAD-LCx (°)		LM-LAD (°)		LM-LCx (°)		Left coronary non-calcified plaque	Left coronary calcified plaque
														Systole	Diastole	Systole	Diastole	Systole	Diastole
1	M	38	23.4509	Y	N	N	Y	N	N	N	N	N	0	72.1	76.0667	151.267	149.667	135.067	132.033
2	F	79	25.9107	Y	N	N	N	N	Y	N	N	Y	45	54.9667	59.1	143.133	139.933	150.467	150.967		△
3	M	59	24.6181	Y	N	N	Y	Y	Y	N	N	Y	20	43.5333	45.9333	144	145.4	176.1	169.433		△
4	F	59	22.0386	Y	N	N	N	N	N	N	N	N	30	45	48.8	151.5	146.567	89.0667	86.8667	△
5	M	57	25.2174	Y	N	N	Y	Y	N	N	N	Y	30	63.0667	69.3	148.367	152.867	152.2	146.767		△
6	M	71	26.8274	N	N	Y	Y	N	N	N	N	Y	20	64.0333	69.8	177.267	178.5	128.633	127.067		△
7	M	66	24.8971	N	N	N	N	N	Y	N	N	N	40	57.5667	67.5	138.467	148.433	115.467	123.467		△
8	M	62	21.7738	Y	Y	N	Y	Y	N	N	N	Y	40	64.5667	75.3	135.167	124.567	167.9	167.867	△
9	F	63	26.0375	N	N	N	N	N	N	N	N	N	40	72.5333	76.6667	129.667	127.867	146.9	151.267		△
10	F	64	21.875	Y	N	N	N	N	N	N	N	N	20	49.9333	51.5	131.8	141.267	180	180	△
11	F	64	19.9792	Y	N	N	N	N	N	N	N	N	20	56.7667	65.9667	134.867	132.033	180	164.7	△
12	M	44	23.3067	N	N	N	N	N	N	Y RCA	N	Y	30	86.7333	93.6	151.8	148	117.967	115.3		△
13	F	71	19.052	Y	N	N	N	N	N	N	N	Y	40	52.5333	62.5667	150.333	145.567	167.3	167.5	△
14	F	58	20.5457	Y	N	N	N	N	Y	N	N	Y	30	55.9333	56.1333	147.9	144.633	172.033	165.767	△
15	M	54	24.8016	N	N	N	N	N	N	N	N	N	20	69	74.9	144.3	121.933	145.433	139.833	△
16	M	70	21.2245	Y	Y	Y	N	N	N	N	N	Y	40	74.8333	79.7333	148.267	155.167	146.167	133.7	△
17	M	73	21.3382	Y	N	Y	Y	Y	N	N	N	N	30	47.4333	55.1667	135.033	141.1	124.767	115.4		△
18	M	48	24.2215	N	Y	Y	Y	N	Y	Y RCA	N	N	35	108.467	115.967	145.167	142.667	101.4	97	△
19	M	50	17.9902	N	N	Y	Y	Y	N	N	N	Y	30	94.1	105.367	154.4	153.733	92.4	94.1	△
20	M	82	35.4922	Y	N	Y	N	N	N	Y RCA	N	N	40	82.4333	88.1333	136.6	136.6	149.133	144.533		△
21	M	48	21.9713	N	N	N	N	Y	N	Y RCA	N	Y	45	65.3667	72.3667	148.233	145.767	158.067	143.6		△
22	F	78	24.6094	N	N	N	N	N	N	N	N	N	20	47.4	49.2333	155.867	148.533	128.8	122.867		△
23	F	77	25.6312	Y	N	N	N	N	N	N	N	N	30	47.7333	53.2667	137.1	134.567	180	180	△
24	M	59	23.4375	N	N	N	Y	Y	N	N	N	N	30	71.3	77.7667	144.733	145.967	152.133	146.233	△
25	M	47	37.1255	N	N	N	N	N	N	N	N	N	20	42.1667	50.1	140.9	144	156.233	143.067	△
26	M	65	25.8645	N	N	N	N	N	N	N	N	N	20	58.9333	60.3333	138.433	132.867	111.833	78		△
27	F	52	20.1956	Y	N	N	N	N	N	N	N	N	0	91.4333	92.4667	124.567	133.133	133.533	127.6
28	M	55	25.8645	N	N	Y	N	N	N	N	N	N	10	53.2333	55.3333	142.867	137.233	180	180
29	F	43	22.6562	N	N	N	N	N	N	N	N	N	10	34.3333	36.1667	199.2	201.567	148.7	146.367
30	M	60	21.9713	Y	Y	N	N	N	N	N	N	Y	45	77.2	76.2	142.9	140.8	180	147.7		△
31	M	42	32.2754	Y	N	N	Y	N	N	N	N	Y	40	51.6667	51.4667	148.4	142	180	180	△
32	F	64	20.8117	N	N	N	N	N	N	N	N	N	40	65.5333	67.1667	151.667	152.6	139.367	136.933	△
33	M	63	23.9512	Y	N	Y	Y	N	N	N	N	Y	30	66.0667	67.7667	140.1	135.133	119.033	123.6		△
34	M	53	20.3816	N	N	N	N	N	N	N	N	N	30	51.4667	57.6	173.667	173.033	163.133	151.733		△
35	F	60	24.0346	Y	N	N	N	N	N	N	N	Y	40	35.7667	40.8	154.7	148.5	168.333	178.667		△
36	M	41	25.9516	Y	N	N	Y	Y	Y	N	N	N	30	80.7	88.5	151.867	148.133	137.033	123.633		△
37	F	73	24.974	Y	Y	Y	N	N	N	N	N	Y	40	90.9	91.9	126.367	132.4	125.4	114.567		△
38	F	50	24.6548	N	N	N	N	N	N	N	N	Y	50	100.833	108.233	132.067	139.067	89.8	92.8		△
39	M	60	24.8016	N	N	N	Y	Y	N	N	N	Y	50	105.133	122.967	133.967	130.7	115.633	111.033	△
40	M	82	24.6181	N	Y	N	Y	N	N	N	N	Y	100	72.9	79.4	131.333	131.333	158.867	148		△
41	M	72	24.6914	Y	N	N	Y	N	N	N	Y	N	50	52.8333	58.2333	156.867	157.733	153.233	151.167		△
42	M	66	24.977	Y	N	Y	N	Y	N	N	N	Y	70	86.2	90.0667	138.167	139.4	142.8	134.433		△
43	F	70	23.3091	Y	Y	N	N	N	N	N	N	N	60	49.2	66.0667	144.067	142.3	177.033	158.7		△
44	M	54	24.858	Y	Y	N	Y	N	N	N	N	Y	100	101.8	104.167	134.067	134.767	124.533	125.533	△
45	M	71	22.7583	Y	N	N	Y	N	N	N	Y	Y	100	78.2	82.9333	143.7	141	135.367	142.533		△
46	F	61	25.0762	Y	N	N	N	N	N	N	N	N	50	60.5333	62.4333	136.867	147.967	161.1	150.267	△
47	M	66	25.0593	N	Y	N	Y	N	N	N	N	Y	70	36.0333	34.9667	146.733	149.867	171.1	172.967		△
48	M	64	22.4913	Y	N	N	N	Y	N	N	N	N	60	142.667	144.633	126.4	125.833	80.4667	74.7333	△
49	F	64	24.6548	N	N	N	N	N	N	N	N	Y	70	50.6	59.8	162.1	162.033	141.2	140.567		△
50	M	66	24.4898	Y	Y	N	Y	N	Y	Y LAD	N	Y	70	52.9333	52.1333	140.8	142.833	116.367	109.467	△
51	F	61	20.9572	Y	Y	N	N	N	Y	N	N	Y	100	72.9667	80.1	137.9	136.967	137.067	138.233	△
52	F	49	22.0386	Y	Y	N	N	N	N	N	N	Y	50	81.4667	82.2667	146.433	143.267	127.567	121.4	△
53	M	74	24.968	Y	N	N	Y	Y	N	Y LAD LCX	N	Y	60	76.3	79.5333	180	180	113.1	114.6		△
54	F	60	19.5312	Y	N	Y	N	N	Y	N	N	Y	50	55.6	63.6667	136.733	137.2	164.3	166.733	△
55	F	73	21.7784	Y	N	Y	N	N	N	N	N	Y	90	67.9	68.3	149.1	148.167	144.167	138.233		△
56	M	27	19.5918	N	N	N	Y	Y	Y	Y LAD	N	Y	85	86.4	93.9667	180	180	106.367	100.367	△
57	M	57	20.7967	N	Y	Y	N	N	N	N	N	Y	99	23.3	22.6333	164.867	161.067	174.667	171.633		△
58	F	66	22.8329	N	N	N	N	N	N	N	N	N	50	125.067	130.967	153.267	162.967	74.2	68.1667		△
59	M	65	22.8571	Y	Y	N	N	Y	N	N	N	Y	90	65.9	74.3	125.633	125.867	167.067	163.2		△
60	M	73	23.3234	N	Y	N	Y	N	N	N	N	Y	90	76.7	81.2667	144.967	141.033	143.267	141.5		△
61	F	63	21.6041	Y	Y	N	N	N	N	N	N	Y	70	80.2667	80.2333	137.267	142.1	144.567	143.133		△
62	M	57	23.7387	N	N	N	N	N	N	N	N	Y	100	90.5667	90.3333	148.7	154.8	103.867	106.633	△
63	M	67	22.8571	Y	N	N	N	N	N	N	N	N	70	75.4667	80.9	166.233	162.4	129.167	127.867		△
64	M	57	25.8645	N	N	N	Y	Y	N	N	N	Y	50	45.6333	46.7667	141	143.033	180	180		△
65	F	63	23.1911	Y	Y	N	N	N	N	N	N	Y	50	104.967	114.033	141.167	139.067	113.567	107.7		△
66	M	48	21.8776	Y	Y	N	Y	N	Y	N	Y	N	90	84.5667	92.2667	136.733	136.067	153.733	144.8		△
67	M	77	24.2215	Y	N	N	N	N	N	N	N	Y	50	58.1	59.3667	144.633	151.433	154.367	149.533		△
68	F	68	22.4323	Y	Y	N	N	N	N	N	N	Y	90	72.1	77.1	137.233	134.9	180	180	△
69	M	60	28.0816	Y	Y	Y	Y	N	N	N	N	Y	60	81.0333	83.0667	154.733	153.133	133.833	137.267	△
70	F	61	24.6097	Y	N	Y	N	N	N	N	N	Y	100	63.6667	76.2	136.5	146.367	162.9	145.3		△
71	M	68	26.0276	Y	N	Y	Y	N	N	Y RCA	N	Y	60	50.6667	52.8	150.333	147.6	138.167	138.367		△
72	M	55	23.5294	Y	N	N	Y	N	N	N	N	Y	50	86.0333	88	152.267	143.833	134.3	138.4		△
73	M	65	25.2163	Y	Y	Y	N	N	N	N	Y	N	100	63.9	72.5667	147.633	147.8	151.067	153		△
74	M	63	24.4646	Y	N	Y	Y	N	Y	N	N	Y	90	60.5667	57.7	134.5	134.767	180	180		△
75	M	50	30.1162	N	N	N	N	N	N	N	N	Y	100	99.8333	104.467	147.5	144.4	149.5	140.567		△
76	M	81	32.2421	N	N	N	Y	Y	N	Y RCA LAD	N	Y	70	72.3	86.6667	144.133	141.933	132.733	128		△
77	M	77	26.1719	N	N	N	N	N	N	Y LAD	N	Y	70	75.0667	78.9	153.067	155.5	138.233	128.4	△
78	F	63	18.5901	Y	N	Y	N	N	N	N	Y	Y	70	88.9	94.3667	151.5	153.2	125.5	119.867	△
79	M	50	24.7721	N	N	N	N	Y	N	N	N	Y	70	85.2667	87.1667	153.6	155.667	131.033	121.567	△
80	M	60	27.0416	Y	N	N	Y	N	N	Y RCA	N	Y	50	139.733	141.767	158.333	140.333	106.167	102.133	△
81	M	60	26.9896	Y	N	N	N	Y	N	Y RCA LAD	N	Y	90	141.667	139.767	128.6	135.767	94.8667	92.5333	△
82	M	44	24.0346	N	N	N	N	N	N	Y RCA	N	Y	70	87.7667	89.8333	132	140.1	126.1	129.367		△
83	F	65	18.3143	Y	N	N	N	N	N	Y LAD	N	Y	70	72	79.8	143.433	141.533	180	138.6	△
84	M	60	31.8878	Y	N	N	N	N	Y	Y LAD	N	N	70	57.8333	66.0667	142.233	141.267	180	149.667	△
85	M	64	30.854	Y	N	N	N	N	Y	Y LAD LCX RCA	N	Y	90	80.3	84.4667	145.933	145.933	123.233	128.767		△
86	M	54	29.7442	N	N	N	N	Y	N	Y LAD	N	N	70	81.9	93.5667	135.7	131.167	154.9	140.933		△
87	M	62	27.6817	Y	N	N	Y	N	N	Y LAD LCX	N	Y	90	87.5333	97	136.1	125.167	131.833	142.5	△
88	M	43	24.281	N	N	Y	Y	N	N	Y RCA	N	N	70	76.9667	78.5	146.1	139.533	130.933	135.567	△
89	M	67	23.7812	Y	N	Y	Y	Y	Y	Y RCA LAD	N	Y	70	76.2	80.3667	115.567	124.667	153.833	148.1		△
90	M	55	24.8016	Y	N	N	Y	Y	N	N	N	Y	60	84.5667	93.5333	159.467	156.967	114.767	118.733	△
91	M	52	23.8367	Y	Y	Y	Y	Y	N	Y LAD	N	N	70	78.5667	81.4	135.533	139.833	112.067	114.9		△
92	M	47	22.9591	N	Y	N	Y	Y	N	N	N	Y	70	77.6667	81.0333	144.667	142.933	94.5	97.9		△
93	M	68	25.3906	N	N	N	N	N	N	Y RCA	N	Y	70	43.4667	44.3333	155.467	154.367	180	180		△
94	M	69	19.3772	Y	Y	N	Y	Y	N	Y LAD	N	Y	90	57.7667	65.1667	147.167	152.9	128.967	127.933		△
95	F	76	21.8787	Y	N	Y	N	N	N	N	N	Y	60	94.6	99.0333	155.4	161.467	116.633	111.433		△
96	M	43	24.9135	N	Y	N	Y	Y	Y	N	N	Y	50	83.9667	86.8667	131.967	136.233	152.833	143.3	△
97	M	55	31.2213	N	N	N	N	Y	N	N	N	Y	70	101.733	105.833	134.9	132.467	120.533	122.333		△
98	M	48	27.4145	N	N	Y	N	N	N	N	N	Y	90	91.4667	92.3333	132.233	134.167	128.167	132	△
99	F	50	22.3081	N	N	N	N	N	Y	N	N	Y	70	74.2	84.2333	144.867	151.167	137.467	134.933		△
100	M	49	24.0569	N	N	Y	N	N	Y	N	N	Y	80	74.8	80.0333	180	180	138.333	117.9	△
101	M	54	18.9388	Y	N	Y	Y	Y	Y	N	N	N	70	63.9	71.8	144.5	149.933	153.433	148.8	△
102	M	49	28.3737	N	Y	N	N	N	Y	N	N	Y	70	63.0333	70.9	180	180	150.267	141.067		△
103	M	42	26.5625	Y	Y	N	N	N	N	N	N	N	50	119.7	118.3	160.7	163.5	91.8	88.1	△
104	M	52	19.7777	Y	Y	Y	N	N	N	N	N	N	50	59.3667	72.9667	155.633	147.867	147.7	151.933	△
105	M	62	22.3214	N	N	N	Y	N	N	N	N	Y	60	142.933	137.933	146.767	146.833	94.7333	91.4667	△
106	M	41	21.2245	N	Y	N	Y	Y	N	N	N	N	60	75.7	78.0667	145.533	137.233	143.533	146.167		△
