# Supplementary material for: Quantification of left coronary bifurcation angles and plaques by coronary computed tomography angiography for prediction of significant coronary stenosis: A preliminary study with dual-source CT
Source: PLoS One. 2017 Mar 27;12(3):e0174352. doi: 10.1371/journal.pone.0174352 (PMC5367806; doi:10.1371/journal.pone.0174352)
Supplement: S3 File — A list of per-vessel CCTA parameters of the study population. (XLSX) [file pone.0174352.s003.xlsx]

## Sheet: Sheet1
0 represent coronary stenosis < 50%， 1 represent ≥ 50%	Area stenosis (%)	Diameter stenosis (%)	Lesion length (mm)	MLD (mm)	MLA (mm2)	Remodeling index	Plaque burden (%)	Lipid plaque volume (mm3)	Lipid plaque volume (mm3)	Calciﬁed plaque volume (mm3)	Total plaque volume (mm3)
0	48	40	8.9	1.5	3.4	70	70.9	28.9	73.4	0	102
0	1	9	11.9	3.2	13	117	45.7	25.9	103.9	8.4	138
0	39	30	23.7	3.1	8.9	57	52.6	59.7	209.3	28.2	297
0	28	36	20.1	2.2	8.3	108	52.6	57.8	111	83.5	252
0	44	35	11.9	2.2	5.6	93	61.6	40	90	9.5	140
0	49	43	7	1.2	2.4	129	71.9	14.6	34.6	13.6	63
0	21	20	9.4	2.5	7.6	122	46.8	11	55.8	10.5	77
0	48	34	12.4	2.9	7.9	91	72.4	11.9	58.7	94.5	165
0	43	52	15.6	1.4	3.1	85	54.7	26.9	102.8	0.1	130
0	51	37	6.4	2	4.9	104	56.3	7.6	40	18.2	66
0	77	52	28.6	1.5	2.4	88	61.2	50.5	173	95.4	319
0	24	28	14.8	2.9	11.1	142	51.2	41.8	136.9	12.7	191
0	33	30	5.4	1.6	3.6	115	64.7	9.5	28.2	3.7	41.4
0	75	68	9.9	1	2	107	65.1	13.9	48.5	41	103
0	35	27	8.9	2.4	7.3	81	63	19.8	78.3	35.4	134
0	46	43	14.8	1.5	3.8	96	55.4	29	107.2	16.6	153
0	36	21	14.2	2.5	5.9	119	64.8	31.3	147.1	16.6	195
0	24	27	14.3	2.3	7.1	101	57.4	32.5	124.2	0.5	157
0	15	19	12.9	2.4	6.9	110	48.6	22	70.3	0.8	93
0	52	52	35.2	2.1	7.6	98	58.1	84.3	198.7	226.9	510
0	14	18	12.9	2.5	7.6	96	52.1	30	86.4	5.3	122
0	24	29	16.7	2.1	6.3	129	68.5	32.9	178.6	14.8	226
0	26	30	10.9	1.7	4.6	101	53.5	4.3	46	9.2	60
0	14	20	11.7	1.7	3.9	131	67.6	20.1	92.8	3.1	116
0	54	34	11.8	1.8	3.7	116	64.5	32.4	90.1	0.1	123
0	24	35	7.5	1.9	6.6	127	61.6	18.9	85.7	10.7	95
0	36	31	9.4	1.7	3.8	113	73.2	17.1	89.5	5	112
0	15	24	9	2	5.9	131	70	41.9	77.7	30	150
0	5	13	5.4	2.6	9.1	125	58.6	12.8	43.5	19.4	76
0	2	8	7.9	2.6	10.5	125	52.6	23.1	49.4	20.8	93
0	47	27	9.3	2.1	4.6	61	50.7	13.7	45.5	0.2	59
0	10	6	9	2.1	5	103	63.8	15.2	58.6	16.7	90
0	41	44	6.9	3.2	9.2	77	62.6	9.5	39.4	28.9	78
0	43	22	7.5	2.1	6.2	67	55.1	19.4	37.2	10.3	67
0	65	52	6	1.5	2.6	144	60.8	10	31.7	23.5	65
0	39	35	7.5	1.4	2.8	149	66	14.1	45.1	0.1	59
0	58	42	12.9	1.2	1.8	68	74.2	13.1	71.4	1.3	86
0	66	42	8	1.3	1.8	73	73.2	9.2	53.4	10.1	73
0	25	34	13	2.1	8.1	120	51.9	15.9	74.1	43.3	133
0	1	12	9.4	3	14.9	135	45.4	13.1	70.1	29	112
1	55	52	8.9	1.1	2.4	193	82.9	16.5	79.3	66.1	162
1	30	20	7.4	1.9	4.3	121	65.2	18.2	59.4	0.4	78
1	45	67	32.2	0.6	1.7	151	63.8	69.1	212.5	139.7	421
1	20	53	32.3	1.3	7	104	67.2	79.1	191.8	236.4	507
1	47	49	28.7	1	2.1	66	59.2	75	211.8	4.7	291
1	85	69	23.8	1	1.3	92	73	46.8	169.6	8.6	225
1	67	49	15.2	1.9	4.1	144	55.2	54.9	157.5	12.9	225
1	74	51	59.1	2.3	5.9	97	63.9	125.6	354.5	147	627
1	60	39	19.9	1.9	4.1	60	53.6	67.1	144.4	3.6	215
1	75	61	9.8	1	1.7	63	70.2	17.4	62.1	0.1	80
1	45	31	28.6	1.6	3.6	57	50.8	56.6	141	9.2	207
1	100	100	47	0	0	0	81.6	96.1	316	191.4	603
1	60	39	20.9	1.7	3.2	67	67	39.7	118.6	0.6	159
1	62	46	21.6	1.6	3.6	79	53.5	39.2	116.6	20.9	177
1	16	13	8.3	2.3	6.2	120	53.6	30.3	31.8	0.5	63
1	51	63	61.6	0.9	2.6	150	63.3	99.6	246.2	285.1	631
1	99	92	48.7	1.6	3.3	192	75.5	79.3	195.1	214.5	489
1	13	34	15.2	1.6	6.1	142	64.4	37.7	88.9	31.4	158
1	54	42	23.2	1.7	3.9	129	56.4	40.5	190.7	35.5	267
1	5	35	12.4	1.4	4.3	128	50.9	14.3	57.1	4.3	76
1	32	26	23.2	1.9	4.7	167	64.5	59.9	163.9	78.9	303
1	90	74	29.9	0.6	0.8	92	64.1	64.7	151.8	23.3	240
1	56	42	10.3	2.3	6.4	51	36.6	13.3	31.1	0	44.4
1	88	80	29.6	0.5	1	60	79.2	46.2	169.4	98.3	314
1	64	73	62.2	0.6	1.9	201	61.1	129.7	396.4	70.4	597
1	62	58	23.6	1.1	2.8	100	63.6	41.2	125.9	56.7	223
1	65	51	19.1	1.5	3.5	120	58.2	47.1	130.1	24.9	202
1	99	91	49.9	0.2	0	286	70.4	104.1	214.2	248.3	567
1	63	66	10.8	0.9	2.3	131	72.3	18.6	72.7	59.4	151
1	90	73	13.4	1	1.5	75	62.2	29.4	114.3	3.2	147
1	67	50	30.7	1.5	2.7	141	58	88.3	275.5	6.6	370
1	81	64	65.9	1.1	1.8	74	51.9	112.1	295.6	16.4	424
1	29	35	17.8	2.3	7.9	83	46.3	24.6	106.2	0.6	131
1	88	80	32	0.6	0.9	135	66	91.2	378.5	32.9	503
1	11	45	27.6	1.6	7.8	157	62.6	82.2	260.7	42.7	386
1	95	83	12.9	0.5	0.5	29	69.9	29.6	75.1	1.3	106
1	28	32	29.6	1.8	4.7	87	57.7	67.7	220.7	7.6	296.3
1	62	70	32.5	0.6	1.8	131	65	44.2	182.6	40.2	267
1	66	55	16.4	1.4	2.7	108	73.5	28.4	145.9	36.9	211
1	85	69	7.9	0.9	1.3	117	62.1	21.4	53.6	0	75
1	99	92	44.8	1.6	4.4	173	70.8	109.3	275.9	209	594
1	67	50	30.6	1.4	2.5	113	73.3	86.5	349.1	3.1	439
1	48	52	39.1	1.1	2.9	125	60.2	65.8	167.6	71.4	305
1	31	24	15.3	3.2	9.5	93	50.4	72	213.5	0.2	286
1	33	50	26.7	0.7	2.2	47	67.2	46.2	157.9	36.7	241
1	90	75	36.6	1	1.3	43	66.5	118.9	426.8	12.3	558
1	65	50	7.9	1.3	2.4	64	59.5	13.6	40.7	0.4	55
1	35	32	22.3	2.1	6	91	54.1	62	127.6	79.1	269
1	99	94	17.4	0.2	0.1	98	65.9	22.9	124.6	1.2	149
1	91	74	14.3	0.9	1.1	80	68.6	27.8	153.1	24.5	205
1	93	83	11.8	0.6	0.8	75	75.8	33.5	107.3	0	141
1	80	70	19.1	0.9	1.9	63	68.1	43.6	126.3	1.4	171
1	51	65	13.3	1.2	5.3	198	79.5	45.9	196.8	60.3	303
1	62	51	5.5	1.4	2.6	64	66.6	8.7	41.7	0	50
1	47	36	16.3	2.2	6.4	93	52.7	25.5	103.4	0.7	130
1	66	44	23.2	2	4.5	85	69.7	70	201	125	396
1	52	54	9.3	4.6	20.4	79	49.6	26.2	55.6	6.3	88
1	29	26	26.7	2.8	7.8	74	48.5	83.7	128	4	215
1	71	71	14.3	0.4	1.4	75	73.4	24.4	70.3	51.9	147
1	53	40	7.9	1.9	4.4	62	64.9	7.6	53.7	13.3	75
1	46	69	9.9	0.6	2.8	174	82.1	38.7	46.2	44.1	129
1	43	29	13.7	2.1	4.8	58	51.1	33.7	107.7	1.4	143
1	34	25	10.4	2.3	8.5	91	53.7	27.4	71.1	20.4	119
1	99	91	18.9	0.2	0	70	77	42.3	84.1	9.7	136
1	12	36	17.7	1.6	5.2	282	81.6	68.9	199	180.1	448
1	82	77	23.3	0.7	1.4	72	68.3	42.2	115.7	91.7	250
1	96	83	36.1	0.7	1	88	67.7	54.9	217.2	44.6	317
1	49	37	11.9	1.9	3.9	112	66.6	22.4	85.5	34.3	142
1	66	47	22.7	1.3	2.2	82	72.8	25.9	192.3	45.9	264
1	97	85	50.5	0.3	0.2	87	61.2	51.4	240.6	1.2	293
1	64	42	26.3	2.1	4.6	53	58.2	46	210.2	33.1	289
1	100	100	19.4	0	0	0	79.4	12.5	64.6	0.1	77
1	64	63	55.9	1.1	2.9	93	56.6	118	346.1	94.1	558
1	100	99	21.9	0	0	0	65.5	16.7	91.2	0.6	108
1	74	76	21.9	0.7	2.2	67	58.6	38.4	130.2	18.4	187
1	90	75	22.4	0.8	0.9	92	65.9	41.7	195.5	4.2	241
1	79	64	17.4	1.1	1.9	59	61.7	30.1	89.2	0	119
1	56	60	48.9	0.8	1.9	125	66.7	62.3	251	61.7	375
1	96	85	11.4	0.4	0.3	43	72.6	9.6	64	0	74
1	75	57	8.4	1.8	3.7	79	81.7	41.5	74	1.2	117
1	95	80	47.2	0.5	0.4	113	67.4	93	309.8	40	443
1	63	51	31.7	1.6	3.9	51	51	62.4	274.6	44.6	382
1	79	64	15.4	0.8	1	104	74.1	45.2	110.8	6.3	162
1	99	85	26.2	0.4	0.1	150	70.2	27.9	172.9	127.8	329
1	66	46	10.5	1.6	3	71	68.9	23.3	92.2	1.1	117
1	76	62	14.4	1	1.7	43	72.1	24.9	127.3	6.1	158
